# Supplementary material for: Solvent-Free Synthesis of MIL-101(Cr) for CO2 Gas Adsorption: The Effect of Metal Precursor and Molar Ratio
Source: MDPI journal article supplement (doi:10.3390/su14031152), 2022-01-20
Supplement: s1 [file s1]

Archive with 1 entries (1 files):
- sustainability-1525685-supplementary.pdf
