# Supplementary figures and images for: Solvent-Free Synthesis of MIL-101(Cr) for CO2 Gas Adsorption: The Effect of Metal Precursor and Molar Ratio
Source: MDPI journal article supplement (doi:10.3390/su14031152), 2022-01-20

## Supplementary Materials

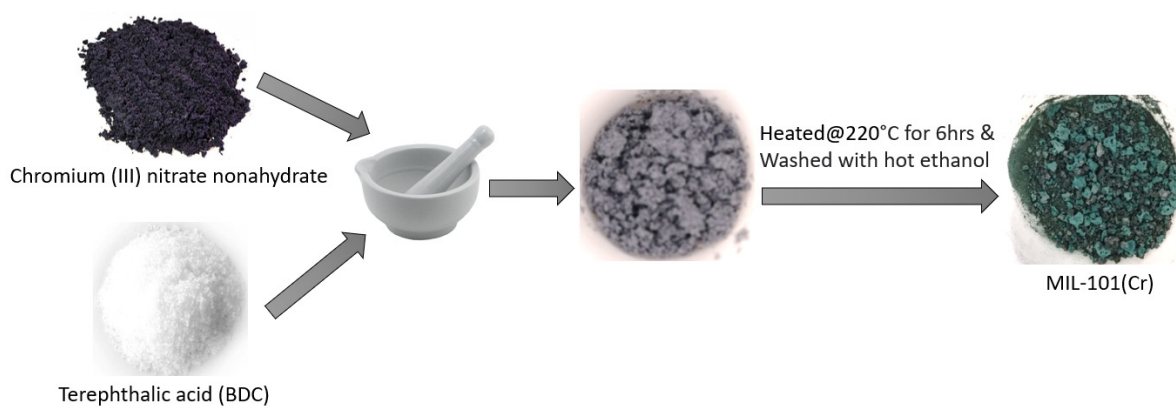

**Supplementary Figure S1.** Color changes along the synthesis of MIL-101(Cr)

Supplement: s1 [file s1]
